# Supplementary material
Source: PubMed Central journal article supplement (PMC3351920)
Supplement: cr201182x1.pdf [file cr201182x1.pdf]

## Supplementary information, Figure S1

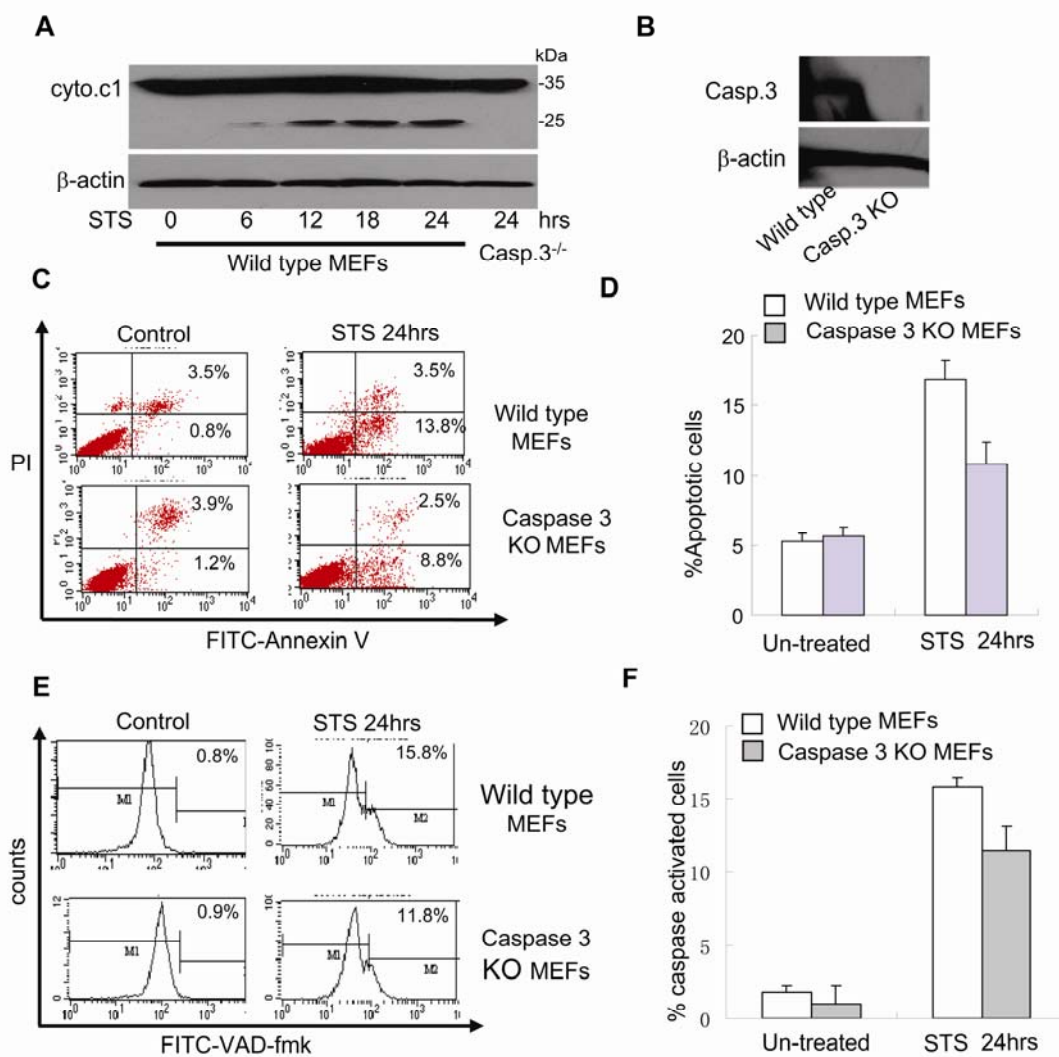

**Figure S1** Cyto.c1 was cleaved in MEF cells, but not in caspase 3-knockout cells. **(A)** The cells were treated with 0.1  $\mu$ M STS for the indicated times, collected and lysed for detecting the cyto.c1 cleavage by western blotting with anti-cyto.c1 antibody. **(B)** Western blot detected the caspase 3 in the wild type (wt) MEFs and caspase 3<sup>-/-</sup> MEFs. **(C, D)** Flow cytometric analysis of apoptosis in the wt MEFs and caspase 3<sup>-/-</sup> MEFs following treatment with STS (0.1  $\mu$ M) for 24 h. **(E, F)** Flow cytometric analysis of total caspase activity in the wt MEFs and caspase 3<sup>-/-</sup> MEFs following treatment with STS (0.1  $\mu$ M) for 24 h.
