# Supplementary material
Source: PubMed Central journal article supplement (PMC3351920)
Supplement: cr201182x3.pdf [file cr201182x3.pdf]

### Supplementary information, Figure S3

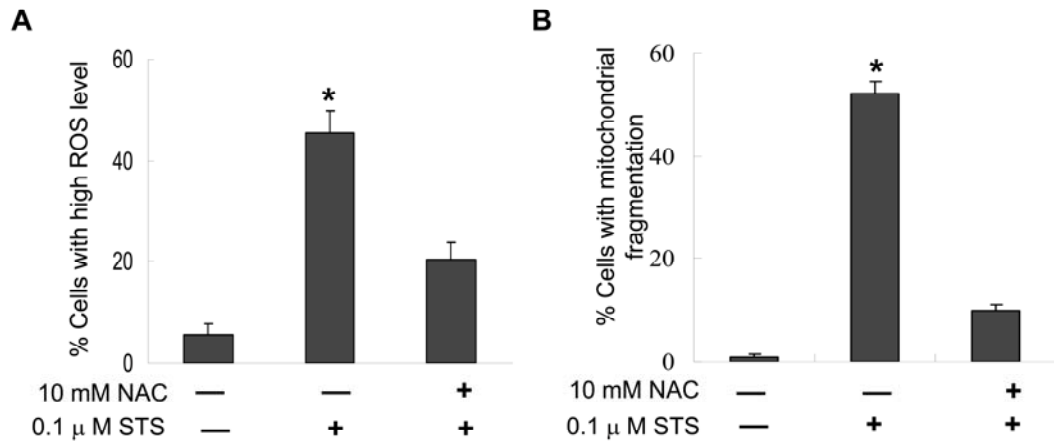

**Figure S3** NAC prevents the production and mitochondrial fragmentation. Statistical results showing that the increase of ROS was inhibited by 10 mM NAC (**A**) and that the mitochondrial fragmentation was inhibited by 10 mM NAC (**B**). Statistical significance was determined by Student's *t*-test, \* $P < 0.05$ .
